# Supplementary material for: 3D Traction Forces in Cancer Cell Invasion
Source: PLoS One. 2012 Mar 30;7(3):e33476. doi: 10.1371/journal.pone.0033476 (PMC3316584; doi:10.1371/journal.pone.0033476)
Supplement: File S1 — The MATLAB (MathWorks, Natick, MA, USA) source code of all necessary programs to carry out measurements of strain energy in 3D collagen gels. (ZIP) [file pone.0033476.s023.zip]

Archive with 3 entries (3 files):
- StrainEnergy3D.zip
- SoftwareDescription.pdf
- README.txt
