# Supplementary material for: 3D Traction Forces in Cancer Cell Invasion
Source: PLoS One. 2012 Mar 30;7(3):e33476. doi: 10.1371/journal.pone.0033476 (PMC3316584; doi:10.1371/journal.pone.0033476)
Supplement: File S1 — The MATLAB (MathWorks, Natick, MA, USA) source code of all necessary programs to carry out measurements of strain energy in 3D collagen gels. (ZIP) [file pone.0033476.s023.zip › README.txt]

This file contains MATLAB implementations of the method published in 

Koch TM, Münster S, Bonakdar N, Butler JP, Fabry B (2012) 3D traction
forces in cancer cell invasion. PLoS ONE

An example data set is available under the following link:
http://tiny.cc/3DTractionPrograms
